# Supplementary material for: Wild Asparagus Shoots Constitute a Healthy Source of Bioactive Compounds
Source: MDPI journal article supplement (doi:10.3390/molecules28155786), 2023-07-31
Supplement: s1 [file s1]

**Supplementary Table S3.** HPLC-DAD and LC-MS parameters used for the analysis of phenolic-rich extracts of *Asparagus* shoots

|                                                |             |                                                 | LC-MS parameters                  |                                  |                    | HPLC-DAD parameters          |                                               |                |                |                      |
|------------------------------------------------|-------------|-------------------------------------------------|-----------------------------------|----------------------------------|--------------------|------------------------------|-----------------------------------------------|----------------|----------------|----------------------|
| Nº                                             | Rt<br>(min) | Phenolic compound                               | m/z precursor<br>ion <sup>a</sup> | m/z fragment<br>ion <sup>b</sup> | Ionization<br>mode | Detection<br>wavelength (nm) | Correlation<br>coefficients (R <sup>2</sup> ) | LOD<br>(µg/mL) | LOQ<br>(µg/mL) | Recovery<br>rate (%) |
| <b>Compounds identified by Rt and m/z ions</b> |             |                                                 |                                   |                                  |                    |                              | -                                             | -              |                | -                    |
| 1                                              | 72.82       | Isorhamnetin-3-O-glucoside (Asterin)            | 479,11841                         | -                                | Positive           | 254                          | -                                             | -              | -              | -                    |
| 2                                              | 74.20       | Quercetin-3-O-rutinoside (Rutin)                | 609,14611                         | 301,03474                        | Negative           | 254                          | 0.999                                         | 0.20           | 0.50           | 98.90                |
| 3                                              | 75.69       | Kaempferol-3-O-rutinoside (Nicotiflorin)        | 593,15119                         | 285,03973                        | Negative           | 254                          | -                                             | -              | -              | -                    |
| 4                                              | 77.28       | Isorhamnetin-3-O-rutinoside (Narcissin)         | 623,16176                         | 315,05081                        | Negative           | 254                          | -                                             | -              | -              | -                    |
| 5                                              | 79.40       | Quercetin                                       | 301,03538                         | 271,02426                        | Negative           | 254                          | 0.997                                         | 0.40           | 0.60           | 99.20                |
| <b>Compounds identified by m/z ions</b>        |             |                                                 |                                   |                                  |                    |                              |                                               |                |                |                      |
| 6                                              |             | Chelidonic acid                                 | 182,99351                         | 139,00370                        | Negative           | -                            | -                                             | -              | -              | -                    |
| 7                                              |             | Caffeic acid                                    | 179,03498                         | 135,04429                        | Negative           | -                            | -                                             | -              | -              | -                    |
| 8                                              |             | <i>Trans</i> -ferulic acid                      | 193,05063                         | 134,03643                        | Negative           | -                            | -                                             | -              | -              | -                    |
| 9                                              |             | Syringic acid                                   | 197,04555                         | 123,00734                        | Negative           | -                            | -                                             | -              | -              | -                    |
| 10                                             |             | Sinapic acid                                    | 223,06120                         | 121,02821                        | Negative           | -                            | -                                             | -              | -              | -                    |
| 11                                             |             | Naringenin                                      | 271,06120                         | 153,01779                        | Negative           | -                            | -                                             | -              | -              | -                    |
| 12                                             |             | (-)-Gallocatechin                               | 305,06668                         | 139,03884                        | Negative           | -                            | -                                             | -              | -              | -                    |
| 13                                             |             | Quercetin 3'-methyl ether (Isorhamnetin)        | 315,05103                         | -                                | Negative           | -                            | -                                             | -              | -              | -                    |
| 14                                             |             | Myricetin                                       | 317,06558                         | -                                | Positive           | -                            | -                                             | -              | -              | -                    |
| 15                                             |             | <i>p</i> -coumaric acid hexoside                | 325,09289                         | 163,11152                        | Negative           | -                            | -                                             | -              | -              | -                    |
| 16                                             |             | 5- <i>O-p</i> -coumaroylquinic acid             | 337,09179                         | 271,02426                        | Positive           | -                            | -                                             | -              | -              | -                    |
| 17                                             |             | Chlorogenic acid                                | 353,08781                         | 163,03566                        | Negative           | -                            | -                                             | -              | -              | -                    |
| 18                                             |             | (-)-Epicatechin gallate                         | 441,08272                         | -                                | Negative           | -                            | -                                             | -              | -              | -                    |
| 19                                             |             | Kaempferol-3- <i>O</i> -glucoside (Astragalin)  | 447,09328                         | -                                | Negative           | -                            | -                                             | -              | -              | -                    |
| 20                                             |             | Quercetin-3- <i>O</i> -glucoside (Isoquercetin) | 463,08821                         | -                                | Negative           | -                            | -                                             | -              | -              | -                    |
| 21                                             |             | Pelargonidin 3- <i>O</i> -diglucoside           | 595,16575                         | 271,06010                        | Positive           | -                            | -                                             | -              | -              | -                    |

<sup>a</sup> Mass error lower than 5 ppm.<sup>b</sup> Mass error lower than 10 ppm.
