# Supplementary material for: Wild Asparagus Shoots Constitute a Healthy Source of Bioactive Compounds
Source: MDPI journal article supplement (doi:10.3390/molecules28155786), 2023-07-31
Supplement: s1 [file s1]

Supplementary Table S1. Selected data on ascorbic acid, phenolics, and antioxidant activity of green *Asparagus* spp. shoots

| Codes/Species                       | Vitamin C<br>mg/100 g fw | Main phenolics                                                                                                                                         | Total phenolics <sup>c</sup>                               | Antioxidant activity                                       | References             |
|-------------------------------------|--------------------------|--------------------------------------------------------------------------------------------------------------------------------------------------------|------------------------------------------------------------|------------------------------------------------------------|------------------------|
| <i>A. acutifolius</i>               |                          |                                                                                                                                                        |                                                            |                                                            |                        |
| RAC1                                | 15.6                     | CfA 24.4; I 249; K 290; My 63; M3O 235.4; PrA 19.1; Q 1240; QG 186 mg/kg fw                                                                            | TPA 43;<br>TFC 2263 mg/kg fw                               | -                                                          | Salvatore et al., 2005 |
| RAC2                                | 117                      | CiA 0.1; Med 1.2; Sir 0.5; SA 0.6; BA 1.2; FA 0.5; CouA 0.6; SyrA 1.0; 3,4-diOMeP 1.5; <i>p</i> HBA 1.2; <i>p</i> HPAA 1.0; C 1.3; PrA 1.5 mg/100 g fw | TPC 41.97 mg/100 g fw                                      | -                                                          | Ferrara et al., 2011   |
| RAC3                                | -                        | Nic 2.2; R 26.3; SAP 5.3; Nar 1.6 mg/100 g fw                                                                                                          | TPA 35.4 mg/100 g fw<br>TFC 30.9 mg/100 g fw               | -                                                          | Barros et al., 2011    |
| RAC4                                | 21.9                     | -                                                                                                                                                      | -                                                          | -                                                          | Martins et al., 2011   |
| RAC5                                | -                        | BA 5; CfA 2; CiA 4; CouA 2; Ct 1; FA 3; GA 26; PrA 4; QG 25; R 28; % of TP                                                                             | TPA 2289 mg GAE/100 g fw                                   | -                                                          | Di Maro et al., 2013   |
| RAC6<br>Three extraction<br>systems | -                        | Bound P: Rut 0.1-3.0; Nic 0.0-0.2; Nar 0.2-2.1 g/kg dw<br>Free P: Rut 0.1-0.9; Nic 0.0-0.1; Nar 0.1-0.8 g/kg dw                                        | TPA 200-800 mg GAE/100 g dw;<br>TFC 140-160 mg CE/100 g dw | ABTS 0.1-2.1 mg TE/100 g dw<br>DPPH 0.3-1.1 mg TE/100 g dw | Poljuha et al., 2015   |
| RAC7                                | -                        | -                                                                                                                                                      | TPA 620 mg GAE/100 g fw                                    | -                                                          | Palfi et al., 2017     |
| RAC8                                | -                        | CiA 55; CfA+CfA der 30; ChA 65; CFQA 25; Rut 299; Nic 18; Nar 215 mg/100 g dw                                                                          | TPC 1200 mg CAE/100 g dw                                   | -                                                          | Sergio et al., 2020    |
| RAC9<br>var. wild green             | -                        | CiA 66.76; ChA 82.08; Rut 80.41; Nar 95.69 mg/100 g dw                                                                                                 | TFC 850 mg CE/100 g dw                                     | ABTS 0.95 mg TE/100 g dw                                   | Sergio et al., 2021    |
| RAC9<br>var. wild violet            | -                        | CiA 70.16; ChA 30.94; Rut 203.03; Nar 154.16 mg/100 g dw                                                                                               | TP 1000 mg CE/100 g dw                                     | ABTS 0.75 mg TE/100 g dw                                   | Sergio et al., 2021    |
| RAC10                               | -                        | PrA 26; <i>p</i> HBA 15; VA 11; CfA 297; <i>p</i> HBA 10; SyrA 1; VN 12; CouA 7; FA 28; SAP 9; R 316; Nar 154; NG 61; K 5 mg/kg dw                     | TPA 415;<br>TFC 537 mg/kg dw                               |                                                            | Hamdi et al., 2021     |
| <i>A. horridus</i>                  |                          |                                                                                                                                                        |                                                            |                                                            |                        |
| RAH1                                | -                        | CFGI 3.9; CFGII 1.1; FG 1.1; dFGI 7.1; dFGII 2.0; FH 1.5; IH 2.7; Nar 1.0; KH 4.9; QOD 1.2; Rut 1.1 mg/100 g dw                                        | TPA 18.7 mg/100 g dw<br>TFC 10.9 mg/100 g dw.              |                                                            | Adouni et al., 2018    |
| <i>A. officinalis</i>               |                          |                                                                                                                                                        |                                                            |                                                            |                        |
| RAO1                                | 23 mg/g dw               |                                                                                                                                                        |                                                            | ABTS 65.7 µmol/g dw                                        | Nindo et al., 2003     |
| RAO2                                |                          | Rut 30-60 mg/100 g fw                                                                                                                                  |                                                            |                                                            | Wang et al., 2003      |

|                                                             |                       |                                                                                                                                                                                                                                                    |                                                                                               |                                                                |                             |
|-------------------------------------------------------------|-----------------------|----------------------------------------------------------------------------------------------------------------------------------------------------------------------------------------------------------------------------------------------------|-----------------------------------------------------------------------------------------------|----------------------------------------------------------------|-----------------------------|
| RAO3                                                        |                       | FA 40-182; FAd 0-580; CouA 92-439; <i>p</i> HBA 1-2; VA 1-5; <i>p</i> HBD 1-7; VN 5-41 mg/kg fw                                                                                                                                                    |                                                                                               |                                                                | Rodríguez et al., 2005      |
| RAO4                                                        |                       |                                                                                                                                                                                                                                                    | TPC 4.9-5.0 mg CE/g dw<br>TFC 1.5-4.7 mg RE/g dw                                              | DPPH 10.9-17.4 mM<br>TE/kg dw<br>ABTS 26.2-27.1 mM<br>TE/kg dw | Sun et al., 2007            |
| RAO5                                                        | 23                    | CiA 0.1; Med 0.5; Sir 0.1; SA 0.2; BA 0.2; FA 0.1; CouA 0.4; SyrA 0.6; 3,4-diOMeP 0.4; <i>p</i> HBA 0.6; <i>p</i> HPAA 0.3; C 0.6; PrA 0.3 mg/100 g fw                                                                                             | 27.62 mg/100 g fw                                                                             |                                                                | Ferrara et al., 2011        |
| RAO6                                                        | 12                    |                                                                                                                                                                                                                                                    | TPA 1.9-2.8 mg GAE/100 g fw<br>TFC 0.7-2.2 RE/100 g fw                                        | DPPH 0.63-2.04 µmol<br>TE/kg fw                                | Wei et al., 2011            |
| RAO7                                                        | -                     | Rut 1900-6700 mg/100 dw                                                                                                                                                                                                                            | -                                                                                             | -                                                              | Motoki et al., 2012         |
| RAO8                                                        |                       | Rut 67; QG 10; 3FerQA 9; Nar 5; Nic 2; CfAH 2;                                                                                                                                                                                                     | TPC 280 mg/100 g dw                                                                           |                                                                | Solana et al., 2015         |
| CO <sub>2</sub> -SFE extract                                | -                     | CIA 2; Q 1 % of TPC                                                                                                                                                                                                                                |                                                                                               | -                                                              |                             |
| RAO9                                                        | -                     | -                                                                                                                                                                                                                                                  | TPA 452 mg GAE/100 g fw                                                                       | -                                                              | Palfi et al., 2017          |
| RAO10<br>(5 cultivars)                                      | 2.4-5.9               | CfA 0.0-1.3; CIA 0.0-9.3; CouA 0.0-2.3; FA 0.0-5.8; Ki 1.5-2.2; <i>p</i> HBA 0.2-0.3; Q 1.3-2.3; R 2.9-23.8 mg/kg fw                                                                                                                               | TPA 12-43 mg GAE/kg fw<br>TF7-28 mg RE/kg fw                                                  |                                                                | Chen et al., 2017           |
| RAO11<br>(8 cultivars)                                      |                       | <i>p</i> CouH 1.5-5.2; oCouQA 1.6-7.0; 3FerQA 1.8-7.1; 4FerQA 2.0-3.6; CFQA 33.0-57.2; QRH 7.2-96.4; Rut 94.0-129.3; QG 1.8-6.8; Nar 2.4-7.1; KH 1.2-16.8; Nic 2.0-7.5; IH 2.4-3.4; AR 1.0-10.4; CyRH 0.1-7; CyRut 1.1-58.5; PRut 0.1-1.0 mg/kg dw | TPA 445-685 mg GAE/kg fw                                                                      |                                                                | Slatnar et al., 2017        |
| RAO12<br>(MeOH extract),<br>several agronomic<br>conditions | 7.14-20.40<br>mg/g dw |                                                                                                                                                                                                                                                    | TPA 11.22-387 mg GAE/g dw<br>TFC ~5-9 mg CE/g dw                                              | ABTS 3.14-10.77 mM<br>TE/kg dw                                 | Ku et al., 2018             |
| RAO13<br>(4 drying methods)                                 |                       | Free P: GA 46.4-151.4; Rut 101.4-117.9; CiA 44.3-159.4; FA 160.9-244.8; Q 75.4-118.7 µg/g dw<br>Bound P: GA 18.2-19.9; Rut 23.1-39.3; CiA 52.9-154.9; FA 20.6-66.3; Q 0.0-34.3; K 21.1-23.1 µg/g dw                                                | TPC free: 605.6-791.8<br>TPC bound: 527.4-631.3 µg<br>GAE/g dw<br>TFC: 592.7-837.6 µg CE/g dw |                                                                | Yu et al., 2019             |
| RAO14<br>(5 cultivars)                                      | -                     | Rut 550-1200 mg/100 g dw                                                                                                                                                                                                                           | TPA: 936-720 CAE/100 g dw                                                                     | ABTS 53.7-93.2 mg<br>TE/100 g dw                               | Sergio et al., 2019         |
| RAO15<br>(three genotypes<br>and 5 growing<br>conditions)   | -                     | GA 30.06-341.79; PrA 0.00-22.19; <i>p</i> HBA 0.00-64.32; VA 0.00- 179.72; CfA 0.00- 32.50; CouA 0.00-178.17; FA 56.13-153.41; SNA 16.32-85.81; Rut 31.85- 16318.67; Q3G 0.00- 97.08; Hy 0.00-197.73; K3OG 0.00-57.96; Q 0.00-57.96 µg/100 g dw    |                                                                                               |                                                                | Kobus-Cisowska et al., 2019 |

|                                                  |   |                                                                                                |                                               |                              |
|--------------------------------------------------|---|------------------------------------------------------------------------------------------------|-----------------------------------------------|------------------------------|
| RAO16                                            | - | CFQA 0.68; CafAH 0.35; VC 2.05; Rut 15.01; Nic 0.36; Nar 0.53 mg/kg dw                         | TPC 5.57-6.69 mg/g dw                         | Noperi-Mosqueda et al., 2020 |
| RAO17                                            | - | Rut 33.8-1624.8; Nic 17.3-214.7 mg/kg dw                                                       | TPC 873.7-2,043.8 mg GAE/g dw                 | Eum et al., 2020             |
| 23 varieties checked                             | - |                                                                                                | TFC 18.5-190.1 mg QE/ g dw                    |                              |
| RAO18                                            | - | CIA 1.21-5.51; FA 1.25-4.81; Rut 30.74-92.63; EA 1.36-4.74 µg/g fw                             |                                               | Ayhan & Rosenberg, 2021      |
| 3 extracting solvents checked                    | - |                                                                                                |                                               |                              |
| RAO19                                            | - | CfA 4.0-7.1; CouA 0.65-0.81; FA 1.5-2.4; Q 3.5-6.6; SNA 11.3-14.4; Rut 234.6-442.9 mg/100 g dw | TPA 37-40 mg GAE/g dw<br>TFC 27-29 mg QE/g dw | Cao et al., 2022             |
| 2 cultivation systems at 2 stages of development | - |                                                                                                |                                               |                              |
| RAO20                                            | - | QG 0.36; IH 0.27; Rut 8.10; Nic 0.07; Nar 0.06 mg/100 g dw                                     | TFC 8.87 mg/100 g dw                          | Redondo-Cuenca et al., 2023  |

**Abbreviations:** CAE: caffeic acid equivalents; CE: catechin equivalents; GAE: gallic acid equivalents; dw: dry weight; fw: fresh weight; RE: rutin equivalents; TE: trolox equivalent; TFC: total flavonoids content; TPC: total phenolics content; TPA: total phenolic acids.

**Phenolics:** AR: Apigenin rhamnoside; BA: benzoic acid; C: catechol; Ct: catechin; ChA: chicoric acid; CiA: cinnamic acid; CIA: Chlorogenic acid; CouA: coumaric acid; CfA: Caffeic acid; CFQA: Caffeoyl-quinic acid; CafAH: Caffeic acid hexose; CFGI: Coumaroylferuloyl glycerol I; CFGII: Coumaroylferuloyl glycerol II; CyRH: Cyanidin rhamnosyl hexosides; CyRut: Cyanidin rutinoside; 3,4-diOMeP: 3,4-dimethoxyphenol; EA: ellagic acid; FA: ferulic acid; FAd: ferulic acid dimers; FG: Feruloyl glycerol; dFGI: Diferuloyl glycerol I; dFGII Diferuloyl glycerol II; 3FerQA: 3-Feruloylquinic acid; 4FerQA: 4-Feruloylquinic acid; FH: Feruloylhexoside; GA: gallic acid; Hy: Hyperoside (quercetin 3-*O*-galactoside); I: Isorhamnetin; IH: Isorhamnetin hexosides; K: Kaempferol; Ki: Kaemferide; KH: Kaempferol hexosides; K3OG: Kaempferol 3-*O*-glucoside (astragalin); Nar: narcissin (isorhamnetin-3-*O*-rutinoside); Nic: nicotiflorin (kaempferol 3-*O*-rutinoside); Med: mediaresinol; My: myricetin; M3O: myricetin-3-*O*-glucoside; NG: naringenin; oCouQA: *o*-Coumaroylquinic acid; PRut: Peonidin rutinoside; *p*HBA: *p*-hydroxybenzaldehyde; *p*CouH: *p*-Coumaric acid hexoside; *p*HBA: *p*-hydroxybenzoic acid; *p*HBD: *p*-hydroxybenzaldehyde; *p*HPAA: *p*-hydroxyphenyl acetic acid; PrA: prothocathecuic acid; Q: quercetin; QG: quercetin glycosides; Q3G: Quercetin-3-glucoside (Isoquercetin); QOD: quercetin-*O*-dideoxyhexosylhexoside; QRH: Quercetin rhamnosyl hexosides; Rut: rutin (quercetin 3-*O*-rutinoside); SA: salicylic acid; SNA: sinapic acid; SNAP: sinapic acid pentoside; Sir: siringaresinol; SyrA: syringic acid; VA: vanillic acid; VC: vicenin 2; VN: vanillin.

## References:

- Adouni, K., Chahdoura, H., Mosbah, H., Santos-Buelga, C., González-Paramás, A. M., Cuidad-Mulero, M., Fernandes, Â., Calhella, R. C., Morales, P., Flamini, G., Ferreira, I. C. F. R., Achour, L. (2018). Revalorization of wild *Asparagus stipularis* Forssk. as a traditional vegetable with nutritional and functional properties. *Food & Function*, 9, 1578-1586. <https://doi.org/10.1039/C7FO01687E>.
- Ayhan, N. K., & Rosenberg, E. (2021). Development of comprehensive liquid chromatography with diode array and mass spectrometric detection for the characterization of (poly-) phenolic and flavonoid compounds and application to asparagus. *Food Chemistry*, 354, 129518. <https://doi.org/10.1016/j.foodchem.2021.129518>.

Barros, L., Dueñas, M., Ferreira, I. C., Carvalho, A. M., Santos-Buelga, C. (2011). Use of HPLC–DAD–ESI/MS to profile phenolic compounds in edible wild greens from Portugal. *Food Chemistry*, 127, 169-173. <https://doi.org/10.1016/j.foodchem.2011.01.009>.

Cao, T. L., Cho, N., Lee, T. H., Ahn, S. J., Lee, D. J., & Ku, Y. G. (2022). Bioactive substances, antioxidant enzymes, and anti-cancer activity of asparagus ‘atlas’ grown in an open field and rain-shelter house system. *Horticulture, Environment, and Biotechnology*, 63, 809-821. <https://doi.org/10.1007/s13580-022-00470-2>.

Chen, X. H., Ma, L. H., Dong, Y. W., Song, H., Pu, Y., Zhou, Q. Y. (2017). Evaluation of the differences in phenolic compounds and antioxidant activities of five green asparagus (*Asparagus officinalis* L.) cultivars. *Quality Assurance and Safety of Crops & Foods*, 9, 479-487. <https://doi.org/10.3920/QAS2017.1082>.

Di Maro, A., Pacifico, S., Fiorentino, A., Galasso, S., Gallicchio, M., Guida, V., Severino, V., Monaco, P., Parente, A. (2013). Raviscanina wild asparagus (*Asparagus acutifolius* L.): A nutritionally valuable crop with antioxidant and antiproliferative properties. *Food Research International*, 53, 180-188. <https://doi.org/10.1016/j.foodres.2013.04.026>.

Eum H. L., Yi T. G., Hong S. J., Park N. I. (2020). Variations of bioactive compound contents and antioxidant capacity of asparagus seedlings in 23 varieties. *Horticultural Science and Technology*, 38, 291-302. <https://doi.org/10.7235/HORT.20200028>.

Ferrara, L., Dosi, R., Di Maro, A., Guida, V., Cefarelli, G., Pacifico, S., Mastellone, C., Fiorentino, A., Rosati, A., Parente, A. (2011). Nutritional values, metabolic profile and radical scavenging capacities of wild asparagus (*A. acutifolius* L.). *Journal of Food Composition and Analysis*, 24, 326-333. <https://doi.org/10.1016/j.jfca.2010.10.008>.

Hamdi, A., Jaramillo-Carmona, S., Rodríguez-Arcos, R., Jiménez-Araujo, A., Lachaal, M., Karray-Bouraoui, N., Guillén-Bejarano, R. (2021). Phytochemical Characterization and Bioactivity of *Asparagus acutifolius*: A Focus on Antioxidant, Cytotoxic, Lipase Inhibitory and Antimicrobial Activities. *Molecules*, 26, 3328. <https://doi.org/10.3390/molecules26113328>

Kobus-Cisowska, J., Szymanowska, D., Szczepaniak, O. M., Gramza-Michałowska, A., Kmiecik, D., Kulczyński, B., Szulc, P., Górnaś, P. (2019). Composition of polyphenols of asparagus spears (*Asparagus officinalis*) and their antioxidant potential. *Ciência Rural*, 49. <https://doi.org/10.1590/0103-8478cr20180863>.

Ku, Y. G., Kang, D. H., Lee, C. K., Lee, S. Y., Ryu, C., Kim, D. E., Polovka, M., Namieśnik, J., Gorinstein, S. (2018). Influence of different cultivation systems on bioactivity of asparagus. *Food Chemistry*, 244, 349-358. <https://doi.org/10.1016/j.foodchem.2017.10.044>.

- Lee, E. J., Yoo, K. S., Patil, B. S. (2010). Development of a rapid HPLC-UV method for simultaneous quantification of protodioscin and rutin in white and green asparagus spears. *Journal of Food Science*, 75, C703-C709. <https://doi.org/10.1111/j.1750-3841.2010.01824.x>.
- Martins, D., Barros, L., Carvalho, A. M., Ferreira, I. C. (2011). Nutritional and in vitro antioxidant properties of edible wild greens in Iberian Peninsula traditional diet. *Food Chemistry*, 125, 488-494. <https://doi.org/10.1016/j.foodchem.2010.09.038>.
- Motoki, S., Kitazawa, H., Maeda, T., Suzuki, T., Chiji, H., Nishihara, E., Shinohara, Y. (2012). Effects of various asparagus production methods on rutin and protodioscin contents in spears and cladophylls. *Bioscience, Biotechnology, and Biochemistry*, 76, 1047-1050. <https://doi.org/10.1271/bbb.120143>.
- Nindo, C., Sun, T., Wang, S. W., Tang, J., Powers, J. R. (2003). Evaluation of drying technologies for retention of physical quality and antioxidants in asparagus (*Asparagus officinalis* L.). *LWT-Food Science and Technology*, 36, 507-516. [https://doi.org/10.1016/S0023-6438\(03\)00046-X](https://doi.org/10.1016/S0023-6438(03)00046-X).
- Noperi-Mosqueda, L. C., López-Moreno, F. J., Navarro-León, E., Sánchez, E., Blasco, B., Moreno, D. A., Soriano, T., Ruiz, J. M. (2020). Effects of asparagus decline on nutrients and phenolic compounds, spear quality, and allelopathy. *Scientia Horticulturae*, 261, 109029. <https://doi.org/10.1016/j.scienta.2019.109029>.
- Palfi, M., Jurković, Z., Čosić, J., Terzić, H., Jurković, V., Knežević, N., Vrandečić, K. (2017). Total phenol content and antioxidant activity of wild and cultivated asparagus in Croatia. *Poljoprivreda*, 23, 56-62. <https://doi.org/10.18047/poljo.23.1.9>.
- Poljuha, D., Šola, I., Bilić, J., Dudaš, S., Bilušić, T., Markić, J., Rusak, G. (2015). Phenolic composition, antioxidant capacity content and gastrointestinal stability of Croatian wild edible plants. *European Food Research and Technology*, 241, 573-585. <https://doi.org/10.1007/s00217-015-2486-y>.
- Redondo-Cuenca, A., García-Alonso, A., Rodríguez-Arcos, R., Castro, I., Alba, C., Rodríguez, J. M., Goñi, I. (2023). Nutritional composition of green asparagus (*Asparagus officinalis* L.), edible part and by-products, and assessment of their effect on the growth of human gut-associated bacteria. *Food Research International*, 163, 112284. <https://doi.org/10.1016/j.foodres.2022.112284>.
- Rodríguez, R., Jaramillo, S., Guillén, R., Jiménez, A., Fernández-Bolaños, J., Heredia, A. (2005). Cell wall phenolics of white and green asparagus. *Journal of the Science of Food and Agriculture*, 85, 971-978. <https://doi.org/10.1002/jsfa.2053>.
- Salvatore, S., Pellegrini, N., Brenna, O. V., Del Rio, D., Frasca, G., Brighenti, F., Tumino, R. (2005). Antioxidant characterization of some Sicilian edible wild greens. *Journal of Agricultural and Food Chemistry*, 53, 9465-9471. <https://doi.org/10.1021/jf051806r>.

Sergio, L., Gonnella, M., Renna, M., Linsalata, V., Gatto, M. A., Boari, F., Di Venere, D. (2019). Biochemical traits of asparagus cultivars and quality changes in two differently coloured genotypes during cold storage. *LWT*, *101*, 427-434. <https://doi.org/10.1016/j.lwt.2018.11.054>.

Sergio, L., Boari, F., Pieralice, M., Linsalata, V., Cantore, V., Di Venere, D. (2020). Bioactive phenolics and antioxidant capacity of some wild edible greens as affected by different cooking treatments. *Foods*, *9*, 1320. <https://doi.org/10.3390/foods9091320>.

Sergio, L., Boari, F., Di Venere, D., Gonnella, M., Cantore, V., Renna, M. (2021). Quality evaluation of wild and cultivated asparagus: A comparison between raw and steamed spears. *Agriculture*, *11*, 1213. <https://doi.org/10.3390/agriculture11121213>.

Slatnar, A., Petkovsek, M. M., Stampar, F., Veberic, R., Horvat, J., Jakse, M., Sircelj, H. (2018). Game of tones: Sugars, organic acids, and phenolics in green and purple asparagus (*Asparagus officinalis* L.) cultivars. *Turkish Journal of Agriculture and Forestry*, *42*, 55-66. <https://doi.org/10.3906/tar-1707-44>.

Solana, M., Boschiero, I., Dall'Acqua, S., Bertucco, A. (2015). A comparison between supercritical fluid and pressurized liquid extraction methods for obtaining phenolic compounds from *Asparagus officinalis* L. *The Journal of Supercritical Fluids*, *100*, 201-208. <https://doi.org/10.1016/j.supflu.2015.02.014>.

Sun, T., Powers, J. R., Tang, J. (2007). Evaluation of the antioxidant activity of *asparagus*, broccoli and their juices. *Food Chemistry*, *105*, 101-106. <https://doi.org/10.1016/j.foodchem.2007.03.048>.

Wang, M., Tadmor, Y., Wu, Q. L., Chin, C. K., Garrison, S. A., Simon, J. E. (2003). Quantification of protodioscin and rutin in asparagus shoots by LC/MS and HPLC methods. *Journal of Agricultural and Food Chemistry*, *51*, 6132-6136. <https://doi.org/10.1021/jf0344587>.

Wei, Y., Liu, Z., Su, Y., Liu, D., Ye, X. (2011). Effect of salicylic acid treatment on postharvest quality, antioxidant activities, and free polyamines of asparagus. *Journal of Food Science*, *76*, S126-S132. <https://doi.org/10.1111/j.1750-3841.2010.01987.x>.

Yu, Q., Li, J., Fan, L. (2019). Effect of drying methods on the microstructure, bioactivity substances, and antityrosinase activity of asparagus stems. *Journal of Agricultural and Food Chemistry*, *67*, 1537-1545. <https://doi.org/10.1021/acs.jafc.8b05993>
