# Supplementary material for: Wild Asparagus Shoots Constitute a Healthy Source of Bioactive Compounds
Source: MDPI journal article supplement (doi:10.3390/molecules28155786), 2023-07-31
Supplement: s1 [file s1]

**Supplementary Table S2. Compounds detected in *Asparagus* samples by LC-MS**

| Species/codes         | Phenolic compounds |              |                            |               |              |            |           |                   |                                          |           |                                  |
|-----------------------|--------------------|--------------|----------------------------|---------------|--------------|------------|-----------|-------------------|------------------------------------------|-----------|----------------------------------|
|                       | Chelidonic acid    | Caffeic acid | <i>Trans</i> -ferulic acid | Syringic acid | Sinapic acid | Naringenin | Quercetin | (-)-Gallocatechin | Quercetin 3'-methyl ether (Isorhamnetin) | Myricetin | <i>p</i> -coumaric acid hexoside |
| <i>A. acutifolius</i> |                    |              |                            |               |              |            |           |                   |                                          |           |                                  |
| AC1                   | X                  |              |                            |               |              |            | X         |                   |                                          | X         | X                                |
| AC2                   | X                  |              | X                          |               |              |            | X         |                   |                                          | X         | X                                |
| AC3                   | X                  |              |                            |               |              |            | X         |                   |                                          | X         | X                                |
| AC4                   | X                  |              |                            |               |              |            | X         |                   |                                          | X         | X                                |
| <i>A. albus</i>       |                    |              |                            |               |              |            |           |                   |                                          |           |                                  |
| AL1                   | X                  |              | X                          | X             |              | X          | X         |                   |                                          | X         | X                                |
| AL2                   | X                  |              | X                          | X             |              | X          | X         |                   |                                          | X         | X                                |
| AL3                   | X                  |              | X                          | X             |              | X          | X         |                   |                                          |           | X                                |
| AL4                   | X                  |              | X                          | X             |              |            | X         |                   |                                          |           | X                                |
| AL5                   | X                  |              | X                          | X             |              |            | X         |                   |                                          |           | X                                |
| <i>A. aphyllus</i>    |                    |              |                            |               |              |            |           |                   |                                          |           |                                  |
| AP1                   | X                  |              |                            |               |              |            | X         | X                 |                                          | X         | X                                |
| AP2                   | X                  |              | X                          |               | X            | X          | X         | X                 |                                          | X         | X                                |
| AP3                   | X                  |              | X                          |               |              | X          | X         |                   |                                          | X         | X                                |
| <i>A. horridus</i>    |                    |              |                            |               |              |            |           |                   |                                          |           |                                  |
| H1                    | X                  |              |                            |               |              |            | X         | X                 |                                          | X         | X                                |
| H2                    | X                  |              |                            |               |              |            | X         |                   | X                                        | X         | X                                |
| H3                    | X                  |              | X                          |               |              | X          | X         | X                 | X                                        | X         | X                                |
| H4                    | X                  | X            |                            |               |              |            | X         |                   | X                                        |           | X                                |
| H5                    | X                  |              |                            |               |              |            | X         | X                 |                                          |           | X                                |
| <i>A. officinalis</i> |                    |              |                            |               |              |            |           |                   |                                          |           |                                  |
| O1                    | X                  |              | X                          |               |              |            | X         |                   |                                          |           | X                                |
| O2                    | X                  | X            | X                          |               | X            |            | X         |                   |                                          |           | X                                |

**Supplemental Table 4. Compounds detected in *Asparagus* samples by LC-MS (continued)**

| Species/codes         | Phenolic compounds                            |                  |                         |                                                |                                                 |                                               |                                                   |                                       |                                           |                                                  |
|-----------------------|-----------------------------------------------|------------------|-------------------------|------------------------------------------------|-------------------------------------------------|-----------------------------------------------|---------------------------------------------------|---------------------------------------|-------------------------------------------|--------------------------------------------------|
|                       | 5- <i>O</i> - <i>p</i> -coumaroyl quinic acid | Chlorogenic acid | (-)-Epicatechin gallate | Kaempferol-3- <i>O</i> -glucoside (Astragalin) | Quercetin 3- <i>O</i> -glucoside (Isoquercetin) | Isorhamnetin-3- <i>O</i> -glucoside (Asterin) | Kaempferol-3- <i>O</i> -rutinoside (Nicotiflorin) | Pelargonidin 3- <i>O</i> -diglucoside | Quercetin-3- <i>O</i> -rutinoside (Rutin) | Isorhamnetin-3- <i>O</i> -rutinoside (Narcissin) |
| <i>A. acutifolius</i> |                                               |                  |                         |                                                |                                                 |                                               |                                                   |                                       |                                           |                                                  |
| AC1                   |                                               | X                |                         |                                                |                                                 |                                               | X                                                 | X                                     | X                                         | X                                                |
| AC2                   |                                               | X                |                         |                                                |                                                 | X                                             | X                                                 | X                                     | X                                         | X                                                |
| AC3                   |                                               | X                |                         |                                                |                                                 | X                                             | X                                                 | X                                     | X                                         | X                                                |
| AC4                   |                                               |                  |                         | X                                              |                                                 | X                                             | X                                                 | X                                     | X                                         | X                                                |
| <i>A. albus</i>       |                                               |                  |                         |                                                |                                                 |                                               |                                                   |                                       |                                           |                                                  |
| AL1                   | X                                             | X                | X                       |                                                |                                                 | X                                             | X                                                 | X                                     | X                                         | X                                                |
| AL2                   | X                                             | X                | X                       |                                                |                                                 | X                                             | X                                                 | X                                     | X                                         | X                                                |
| AL3                   | X                                             | X                | X                       |                                                |                                                 |                                               | X                                                 | X                                     | X                                         | X                                                |
| AL4                   | X                                             | X                | X                       |                                                |                                                 |                                               | X                                                 | X                                     | X                                         | X                                                |
| AL5                   | X                                             | X                | X                       |                                                |                                                 |                                               | X                                                 | X                                     | X                                         | X                                                |
| <i>A. aphyllus</i>    |                                               |                  |                         |                                                |                                                 |                                               |                                                   |                                       |                                           |                                                  |
| AP1                   |                                               | X                |                         |                                                |                                                 | X                                             | X                                                 |                                       | X                                         | X                                                |
| AP2                   |                                               | X                |                         |                                                |                                                 | X                                             | X                                                 | X                                     | X                                         | X                                                |
| AP3                   |                                               | X                |                         |                                                |                                                 | X                                             | X                                                 | X                                     | X                                         | X                                                |
| <i>A. horridus</i>    |                                               |                  |                         |                                                |                                                 |                                               |                                                   |                                       |                                           |                                                  |
| H1                    |                                               |                  |                         |                                                |                                                 | X                                             | X                                                 |                                       | X                                         | X                                                |
| H2                    |                                               |                  |                         |                                                |                                                 | X                                             | X                                                 |                                       | X                                         | X                                                |
| H3                    |                                               |                  |                         |                                                |                                                 |                                               | X                                                 |                                       | X                                         | X                                                |
| H4                    |                                               |                  |                         |                                                |                                                 | X                                             | X                                                 |                                       | X                                         | X                                                |
| H5                    |                                               |                  |                         |                                                |                                                 |                                               | X                                                 |                                       | X                                         | X                                                |
| <i>A. officinalis</i> |                                               |                  |                         |                                                |                                                 |                                               |                                                   |                                       |                                           |                                                  |
| O1                    |                                               | X                |                         |                                                | X                                               | X                                             | X                                                 | X                                     | X                                         | X                                                |
| O2                    |                                               | X                |                         |                                                | X                                               | X                                             | X                                                 | X                                     | X                                         | X                                                |
