# Supplementary material for: Wild Asparagus Shoots Constitute a Healthy Source of Bioactive Compounds
Source: Molecules. 2023 Jul 31;28(15):5786. doi: 10.3390/molecules28155786 (PMC10421306; doi:10.3390/molecules28155786)
Supplement: Supplementary file 1 [file molecules-28-05786-s001.zip]

Archive with 4 entries (4 files):
- Supplementary File S1. Methodology.pdf
- Supplementary Table S1. Review.pdf
- Supplementary Table S2 . Phenolics compounds LC_MS.pdf
- Supplementary Table S3. Chromat parameters, LC-MS.pdf
